# Supplementary material for: Serological responses to SARS-CoV-2 following non-hospitalised infection: clinical and ethnodemographic features associated with the magnitude of the antibody response
Source: bioRxiv or medRxiv preprint supplement (doi:10.1101/2020.11.12.20230763), 2020-11-16
Supplement: Supplementary file [file media-1.pdf]

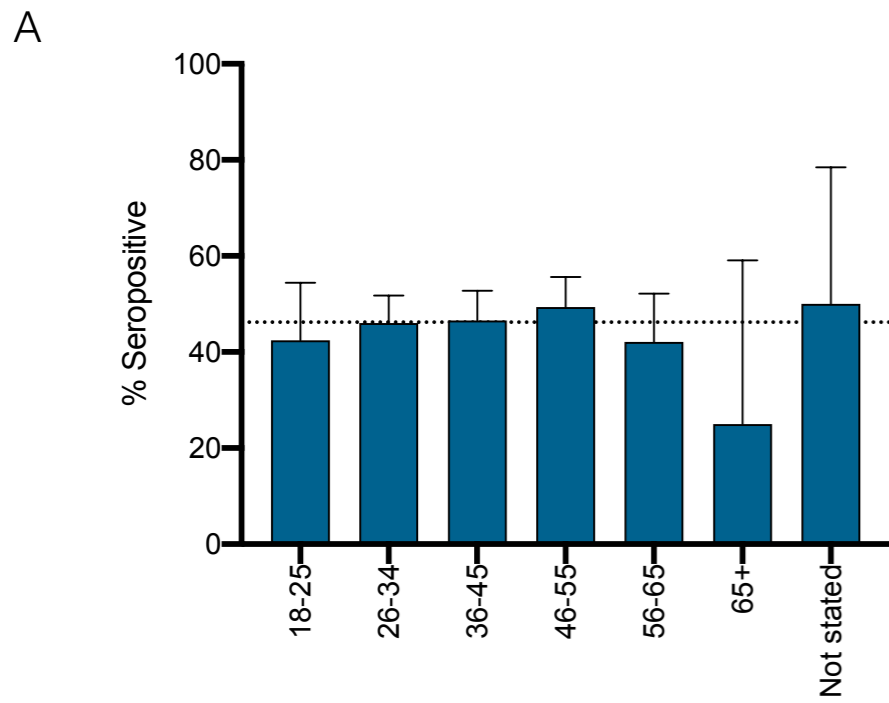

|                  |    |     |     |     |    |   |   |
|------------------|----|-----|-----|-----|----|---|---|
| Seropositive (n) | 28 | 133 | 116 | 119 | 40 | 2 | 4 |
| Total (n)        | 66 | 289 | 249 | 241 | 95 | 8 | 8 |

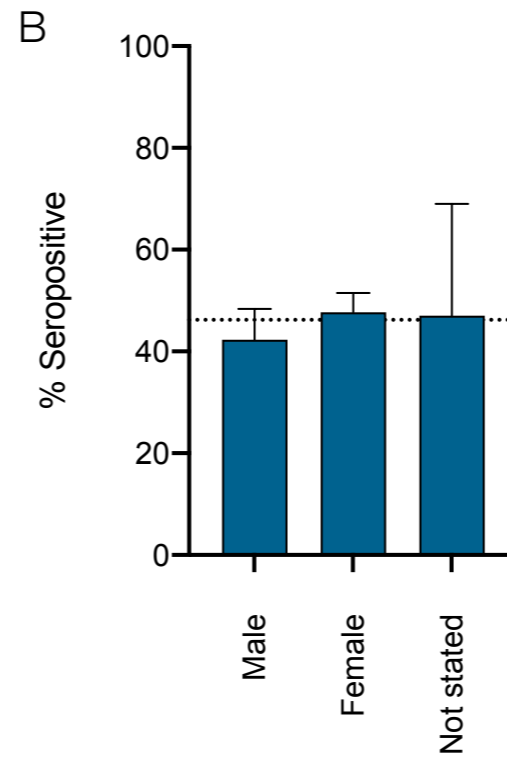

|                  |     |     |    |
|------------------|-----|-----|----|
| Seropositive (n) | 110 | 324 | 8  |
| Total (n)        | 260 | 679 | 17 |

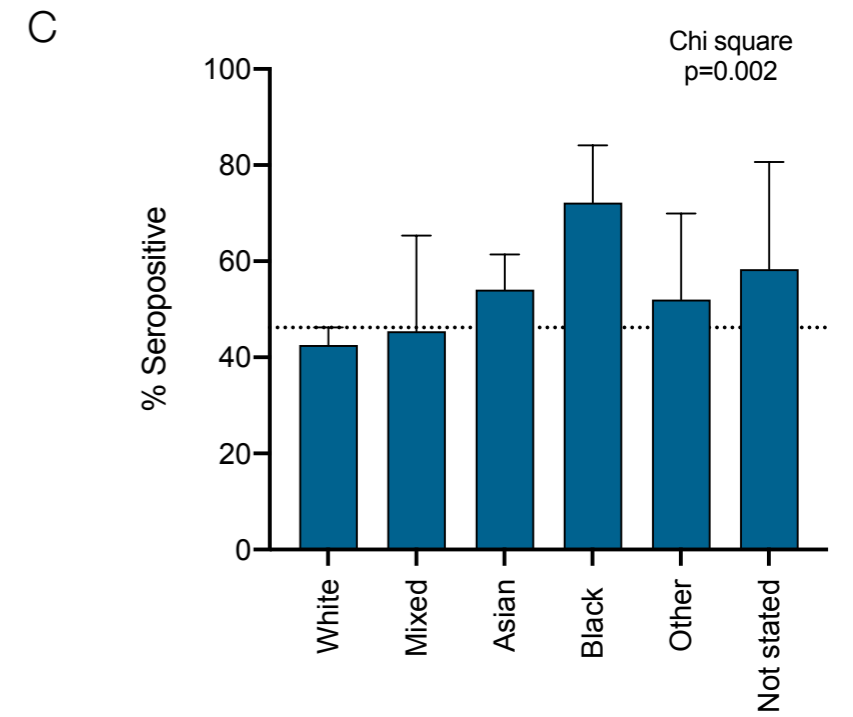

|                  |     |    |     |    |    |    |
|------------------|-----|----|-----|----|----|----|
| Seropositive (n) | 294 | 10 | 92  | 26 | 13 | 7  |
| Total (n)        | 691 | 22 | 170 | 36 | 25 | 12 |

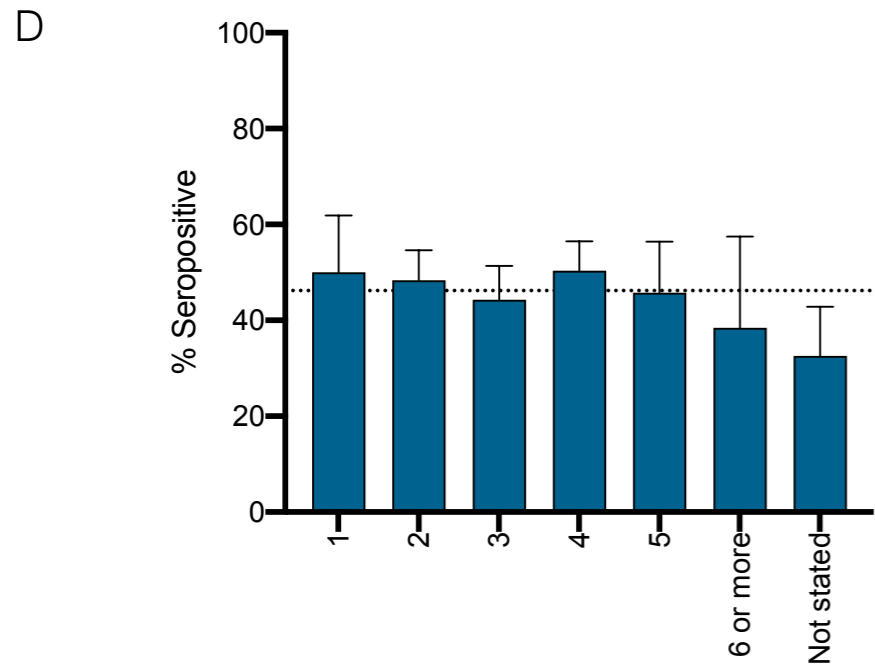

|                  |    |     |     |     |    |    |    |
|------------------|----|-----|-----|-----|----|----|----|
| Seropositive (n) | 32 | 118 | 86  | 129 | 38 | 10 | 29 |
| Total (n)        | 64 | 244 | 194 | 256 | 83 | 26 | 89 |

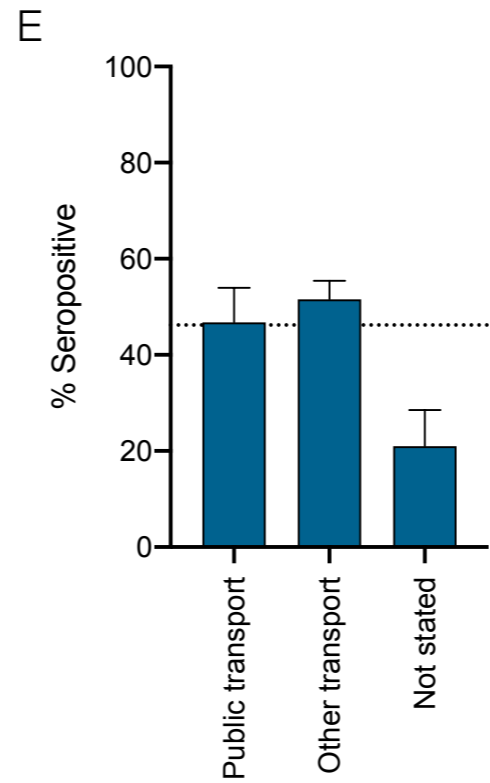

|                  |     |     |     |
|------------------|-----|-----|-----|
| Seropositive (n) | 87  | 326 | 29  |
| Total (n)        | 186 | 632 | 138 |

Supplementary  
Figure 1

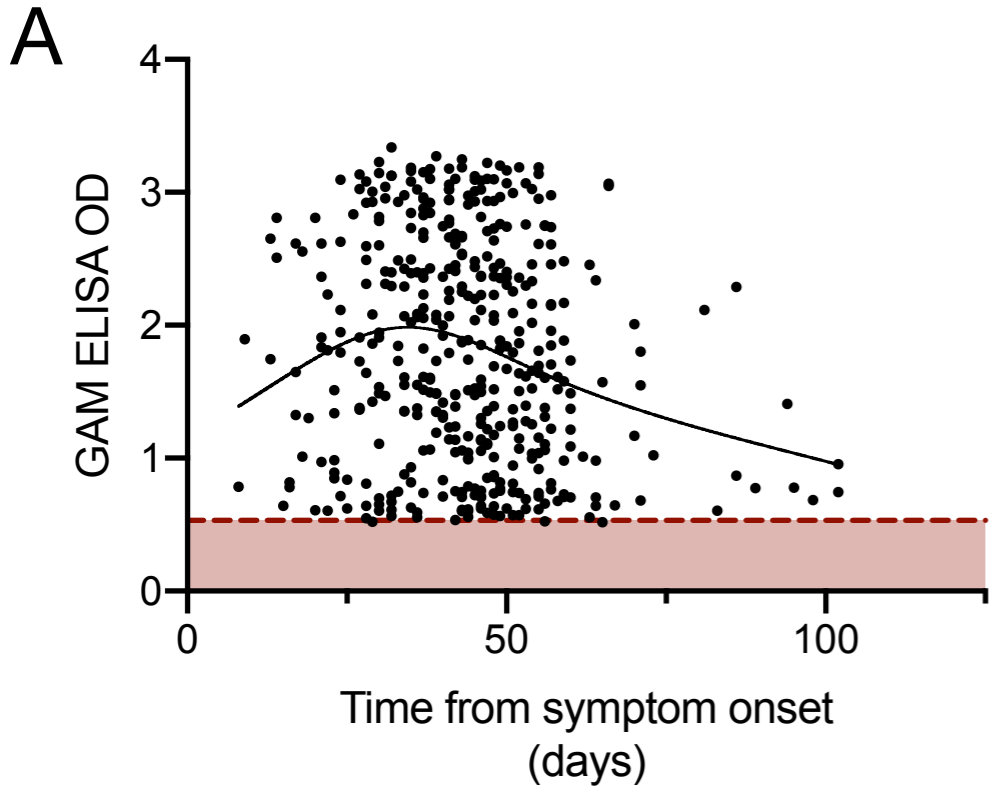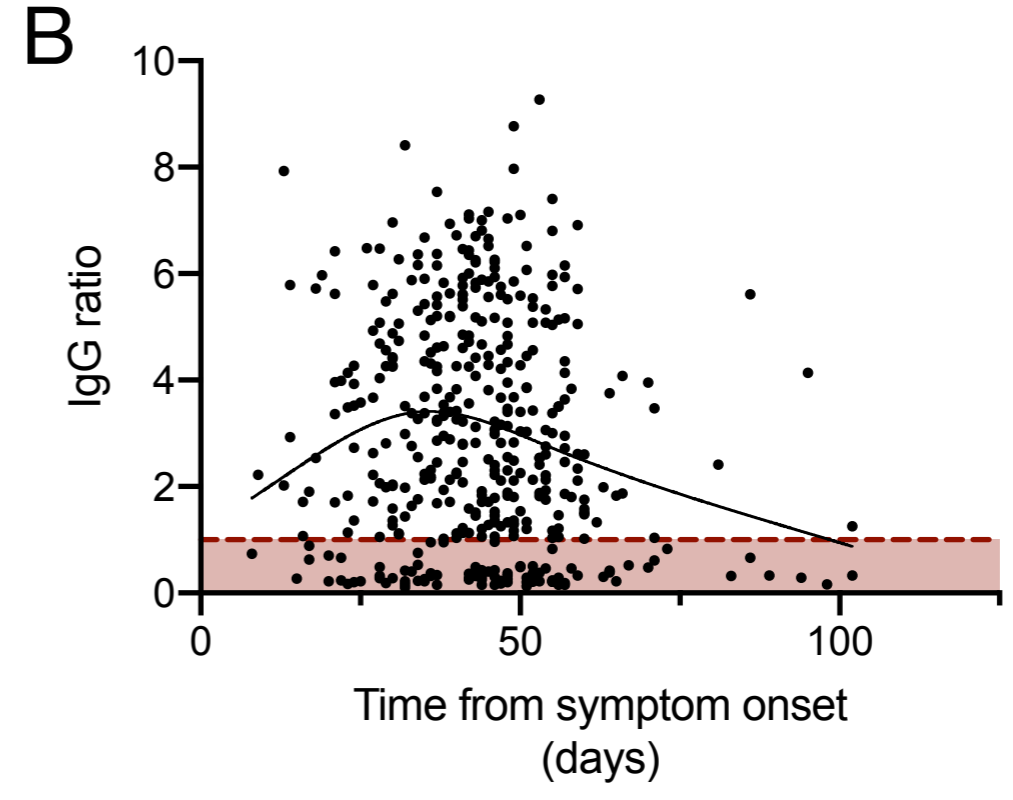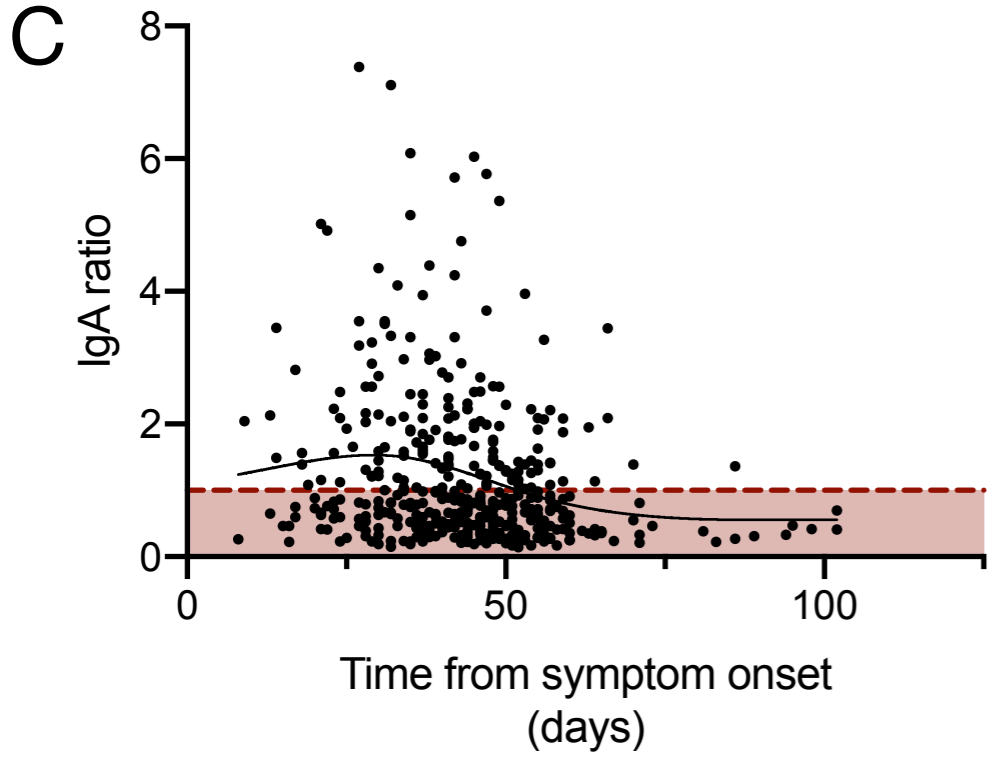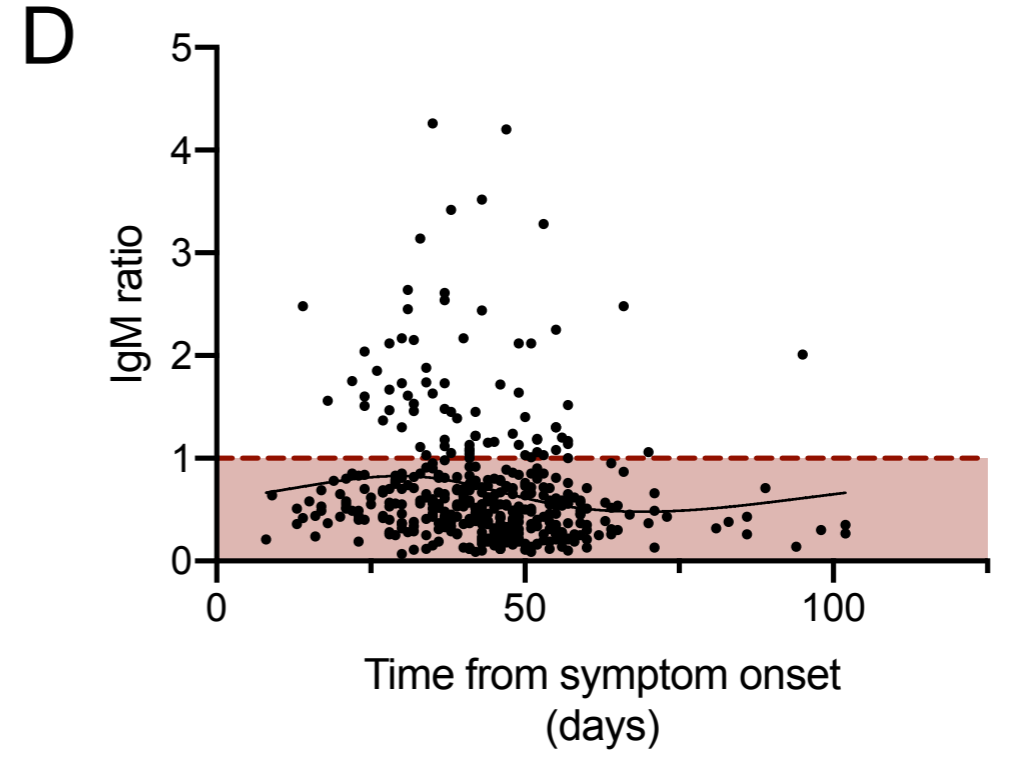

Supplementary  
Figure 2

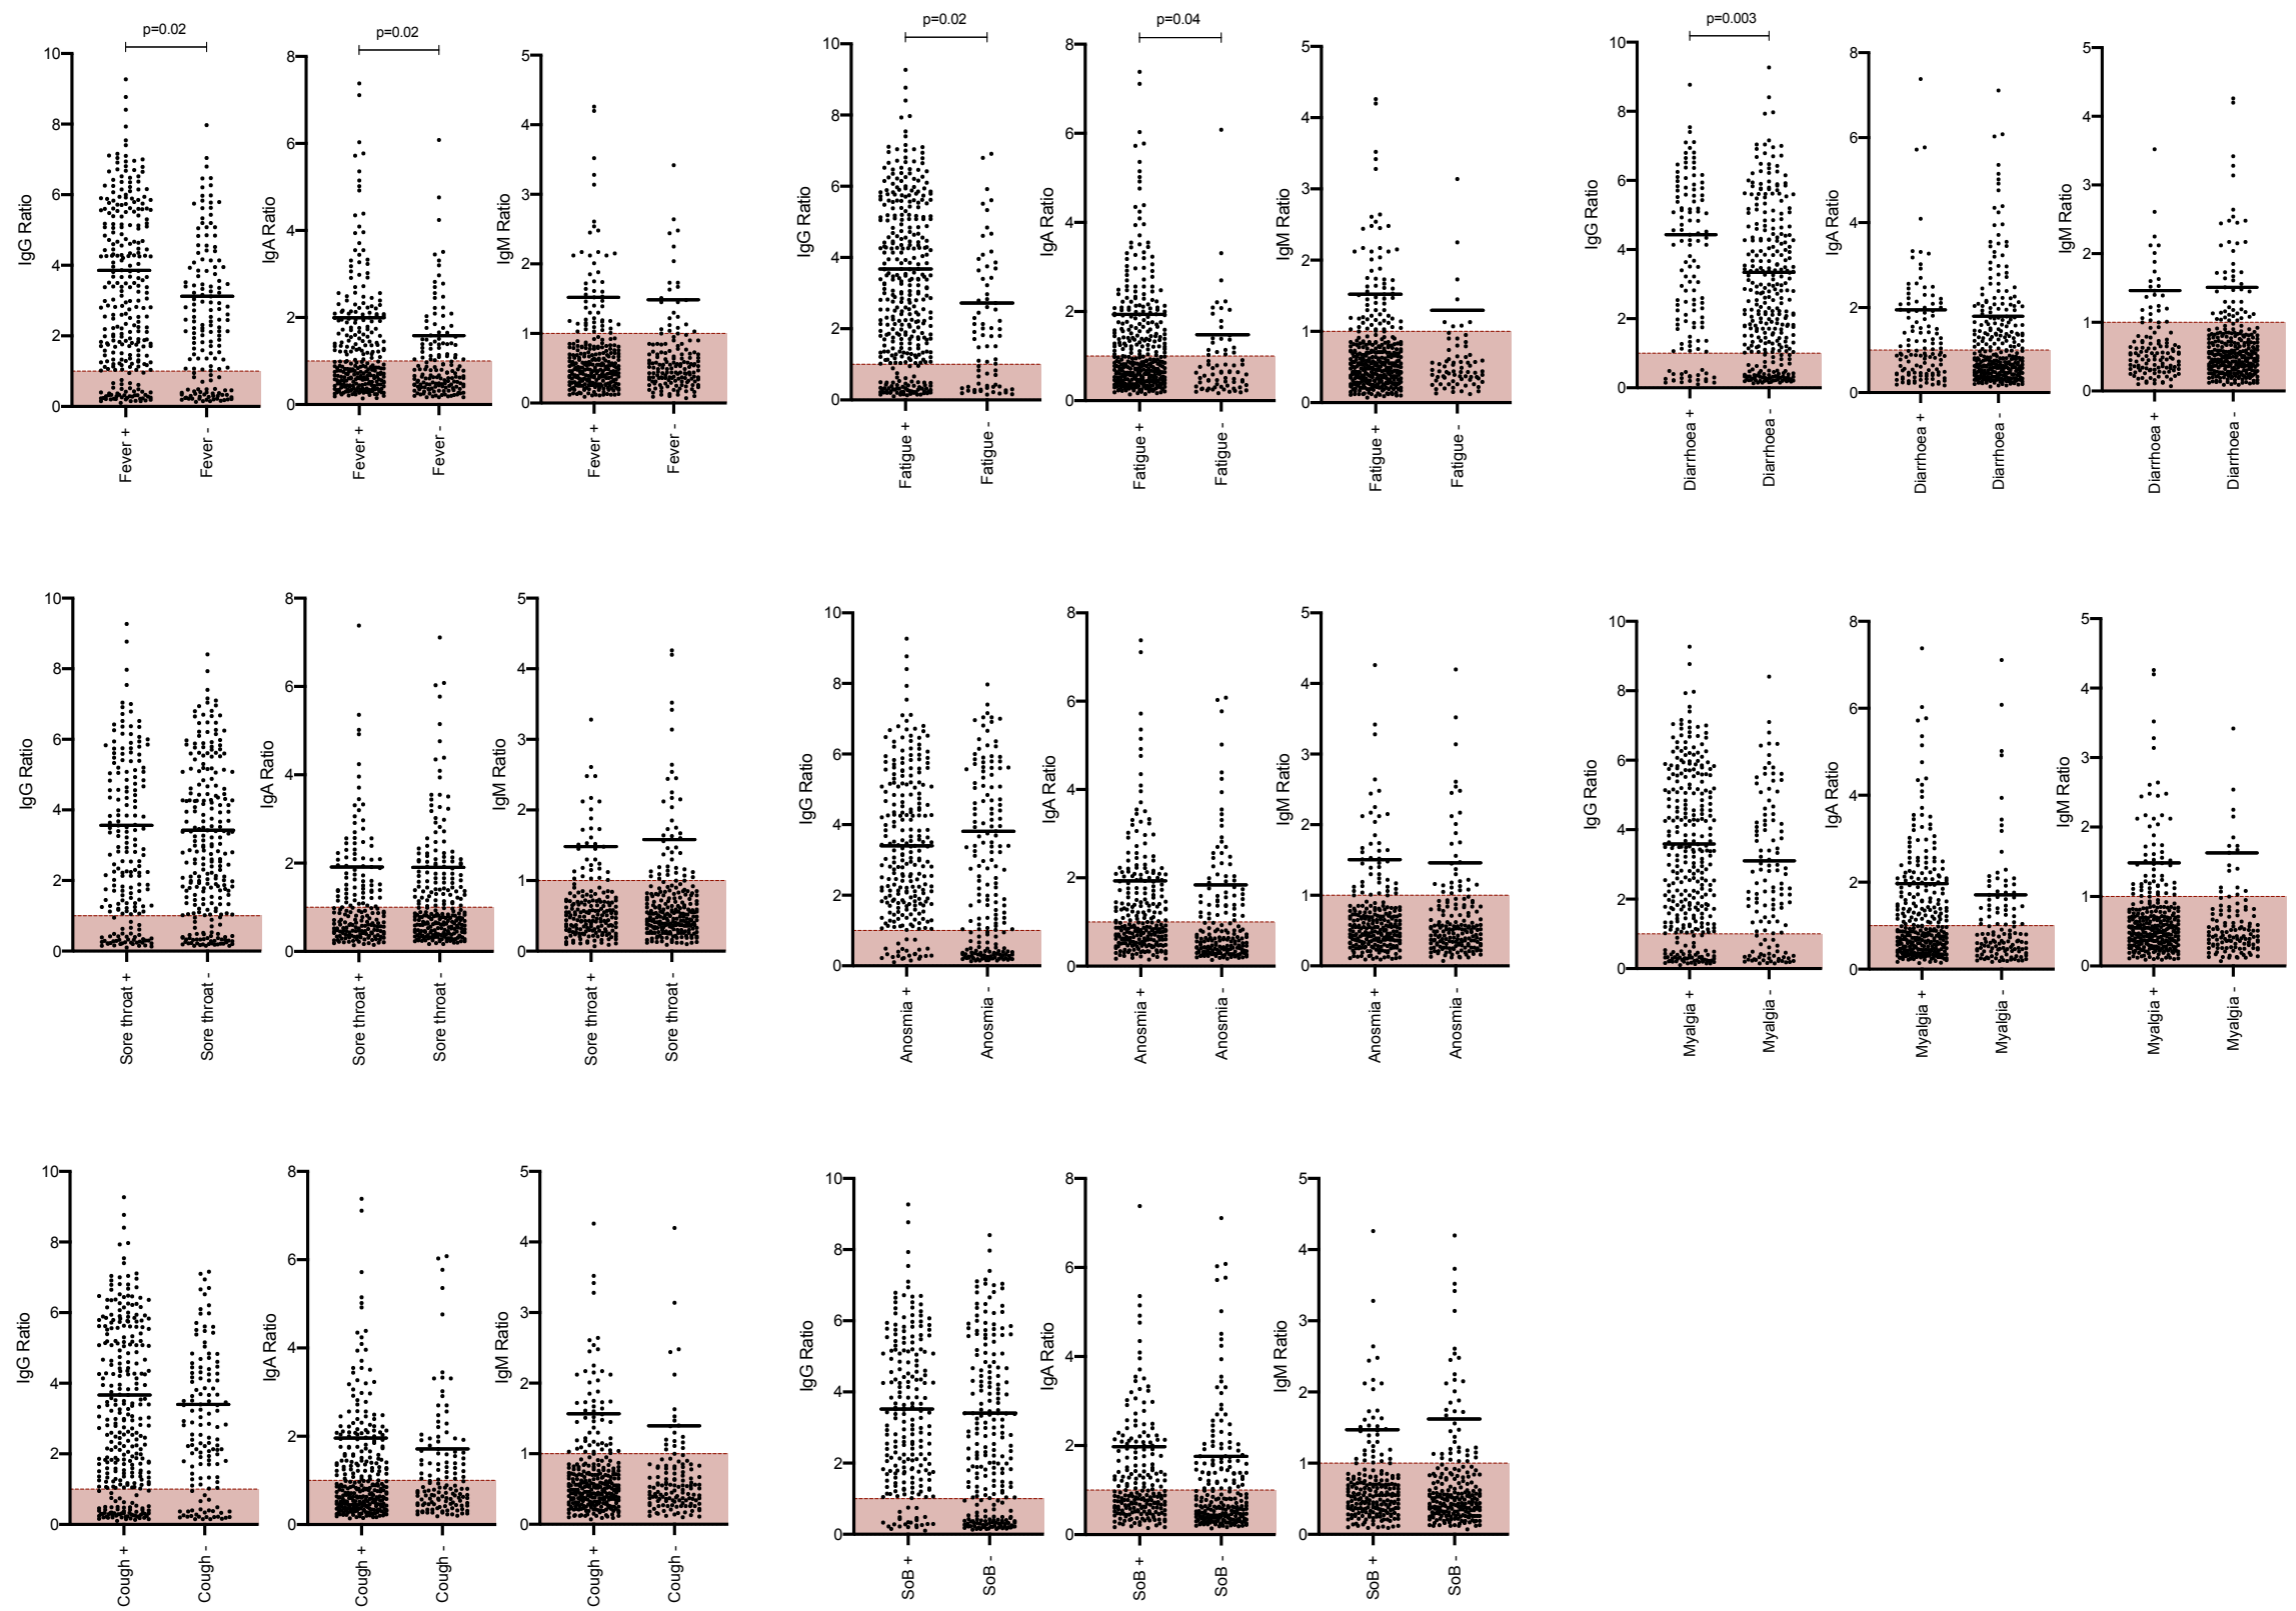

Supplementary  
Figure 3

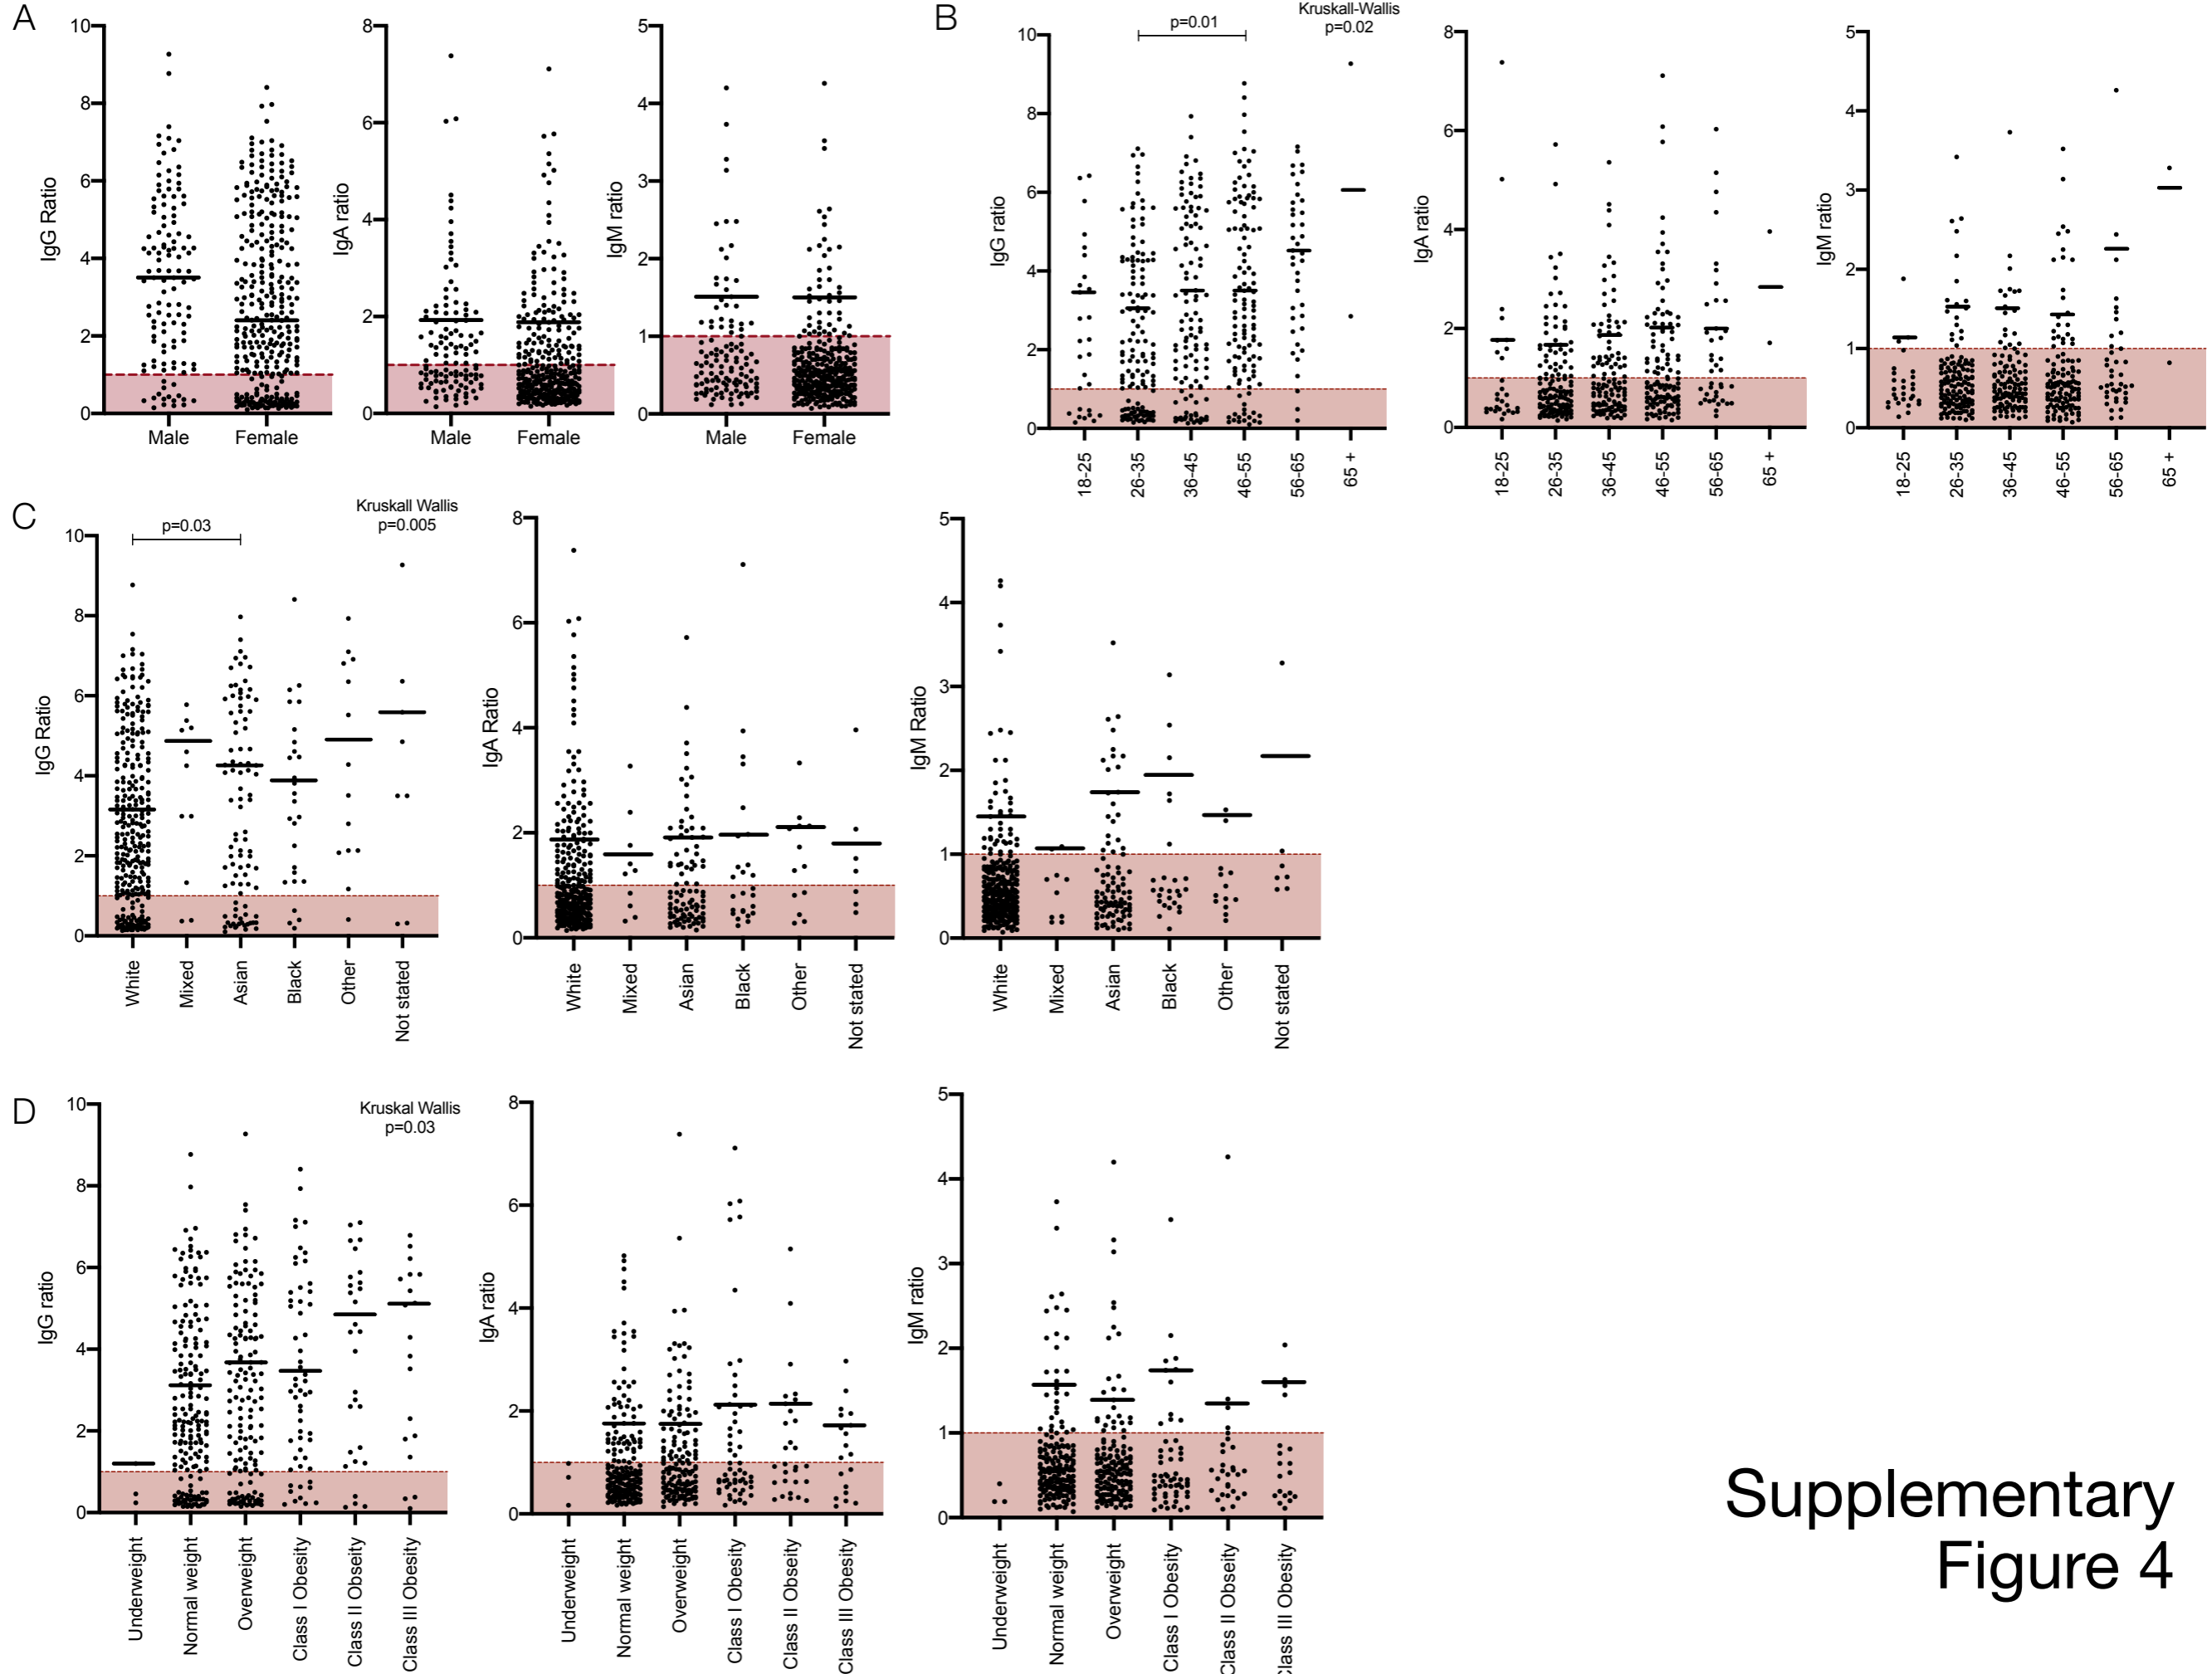

Supplementary  
Figure 4
